# Supplementary material for: Comparative Study of Algal Responses and Adaptation Capability to Ultraviolet Radiation with Different Nutrient Regimes
Source: MDPI journal article supplement (doi:10.3390/ijerph19095485), 2022-04-30
Supplement: s1 [file s1]

## Contents of Supplementary Materials

Measurement of ROS production by *M. aeruginosa* and the SOD activity

Measurement of the photosynthetic pigments in single cells

**Figure S1.** The spectral power distribution and weighted UV radiation of UV- B lamps (TL20W/01RS, Philips) used in the irradiation experiment.

**Figure S2.** A schematic diagram of the irradiation experiments.

**Figure S3.** Fluorescence EEM spectra for EPS produced by three species.

**Figure S4.** Whole-cell absorption spectra of algal cultures at the beginning of mono-cultures. Cell cultures with OD<sub>680</sub> of 0.10 were used for measurement and adsorption values were normalized to the optical density at OD<sub>680</sub>.

**Table S1.** Composition of the modified BG<sub>11</sub> medium under different growth conditions in our experiment.

**Table S2.** The maximum growth rate ( $\mu_{\max}$ , d<sup>-1</sup>) and maximum cell density (10<sup>6</sup> cells/mL) of three species in the mono-cultures and co-cultures under nutrient enrichment conditions and the percentage change of maximum cell density showing in parentheses.

## ROS in algal cells and SOD activity

For the measurement of ROS in algal cells, cells of three species were regularly collected by centrifugation (5000 g for 10 min, 4°C), washed with phosphate-buffered saline (PBS, 50 mmol L<sup>-1</sup>, pH 8.0), and suspended in the PBS solution buffer. Then, the production of reactive oxygen species (ROS) was monitored using the ROS sensitive fluorescence probe 2',7'-dichlorohydrofluorescein diacetates (DCFH-DA [1]). Cells were incubated with 10 µmol L<sup>-1</sup> DCFH-DA (Sigma Aldrich, USA), which could diffuse into cells and its acetate groups were cleaved by intracellular esterases to produce 2',7'-dichlorohydrofluorescein (DCFH). Afterwards, intracellular ROS can oxidize DCFH to the highly fluorescent 2',7'-dichlorofluorescein (DCF), and the fluorescence intensity is proportional to the amount of ROS produced by algal cells. After incubation for 15 min at 37°C in the dark, cells were washed twice with PBS (pH 8.0) and the fluorescence intensity was measured with the excitation at 488 nm and the emission at 525 nm [2].

For the measurement of algal SOD activity, cells of three species were regularly collected by filtration using the 0.2-µm mixed cellulose ester filters (Whatman), which were then re-suspended in PBS solution (50 mmol L<sup>-1</sup>, pH 8.0). The cells were disrupted by an ultrasonic cell pulverizer surrounded by ice bags. After centrifugation (5000 g for 10 min, 4°C), the supernatant was used for the detection of superoxide dismutase (SOD) activity with an Assay Kit (Jiancheng Bioengineering Institute, Nanjing, China).

## Contents of photosynthetic pigments

At different stages of the incubation (Day 1 and 8) in the mono-cultures, a 10-mL subsample of algal cultures was collected and immediately filtrated through 0.22- $\mu$ m GF/C filters (Whatman). The vacuum pressure was below 20 kPa to minimize the lysis and physical damage of algal cells. The filters with retained cells were extracted with a 90% acetone solution for 24-h in the dark and the absorbency of the supernatant was determined at 662, 645 and 470 nm using a UV-visible spectrophotometer, respectively. Then, chlorophyll a (Chl-*a*) and carotenoid (CAR) contents were calculated using the following equation [3].

$$\text{Chl-}a \text{ (}\mu\text{g/mL)} = 11.75 * OD_{662} - 2.35 * OD_{645}$$

$$\text{CAR (}\mu\text{g/mL)} = (1000 * OD_{470} - 2.27 * \text{Chl-}a - 81.4 * (18.61 * OD_{645} - 3.96 * OD_{662})) / 227$$

Meanwhile, biliproteins in non-toxic and toxic *M. aeruginosa* cells were frozen repeatedly in liquid N<sub>2</sub> and thawed in a 0.05-mol L<sup>-1</sup> phosphate buffer (pH 6.7) [2,4]. The homogenate solution was centrifuged at 4000 *g* for 15 min, and the absorbency of the supernatant was measured at 615 and 652 nm. Then, phycocyanin content (PC) was calculated using the following equation.

$$\text{PC (}\mu\text{g/mL)} = 163.2 * OD_{615} - 117.1 * OD_{650}$$

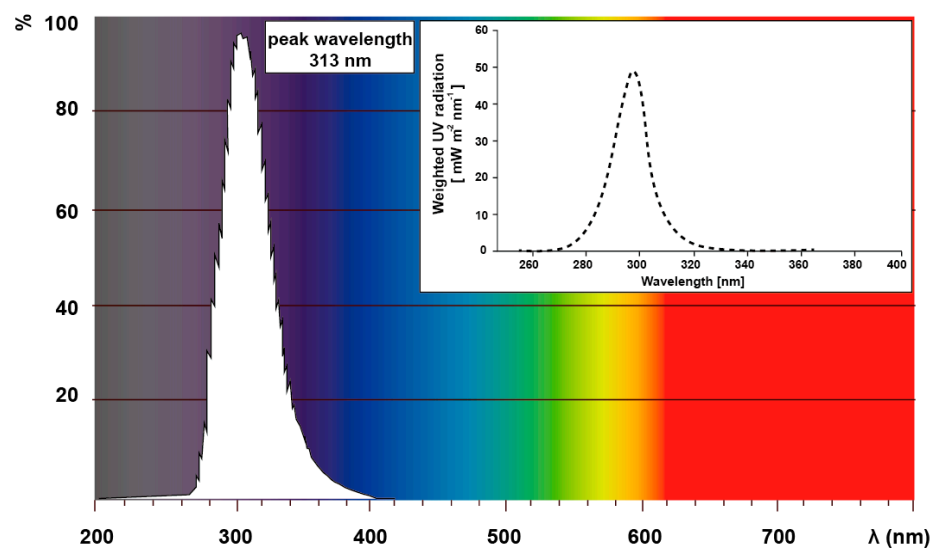

**Figure S1.** The spectral power distribution and weighted UV radiation of UV- B lamps (TL20W/01RS, Philips) used in the irradiation experiment.

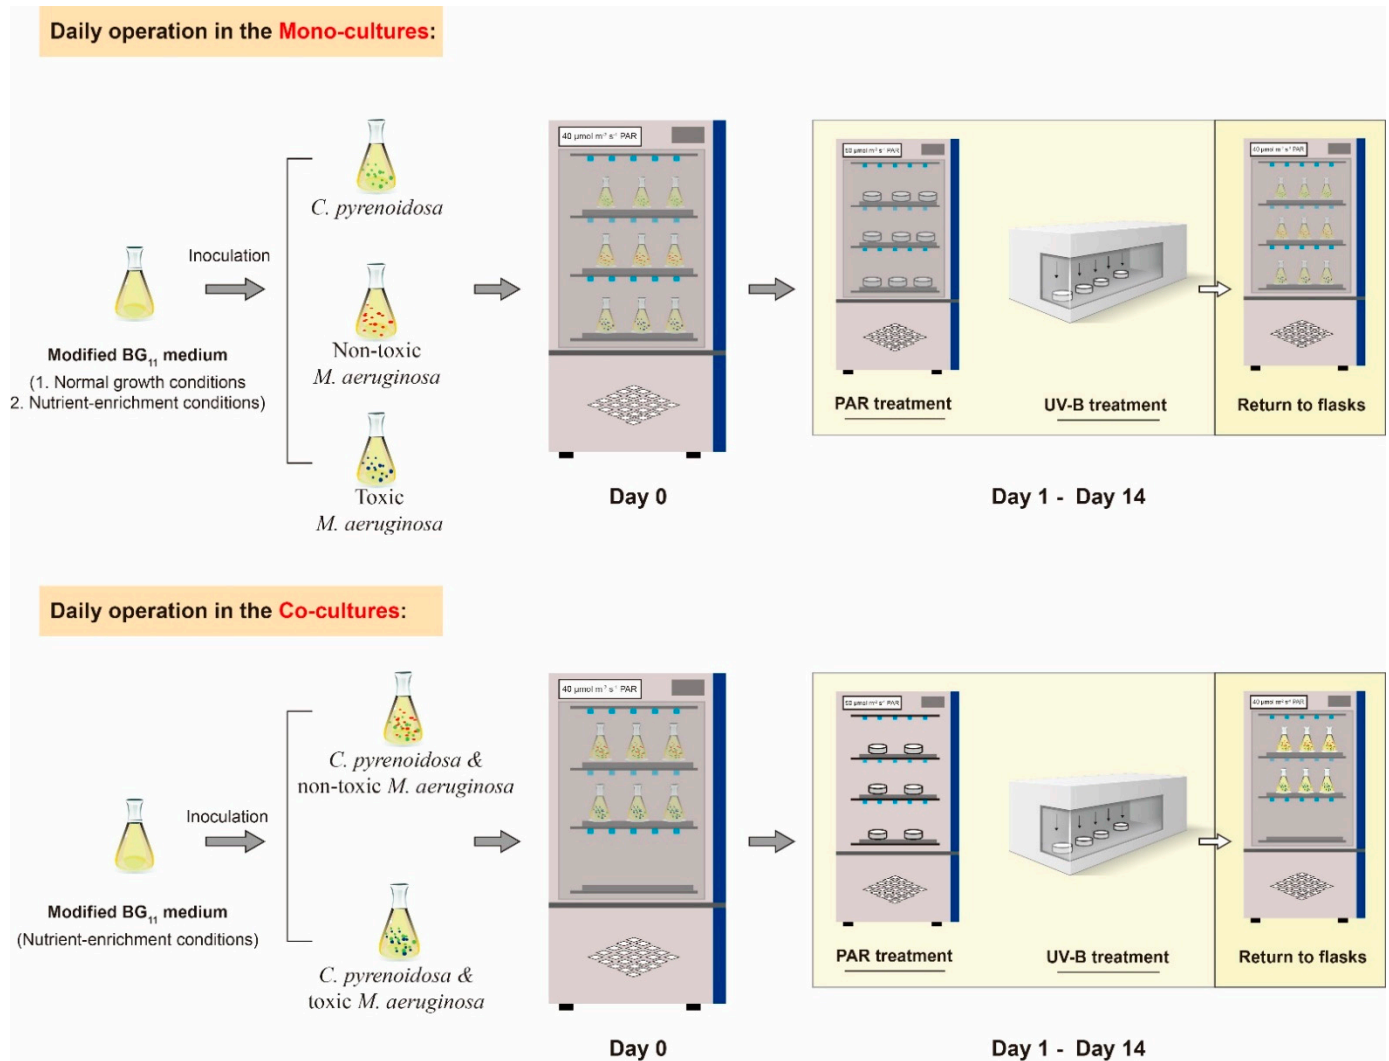

**Figure S2.** A schematic diagram of the irradiation experiments.

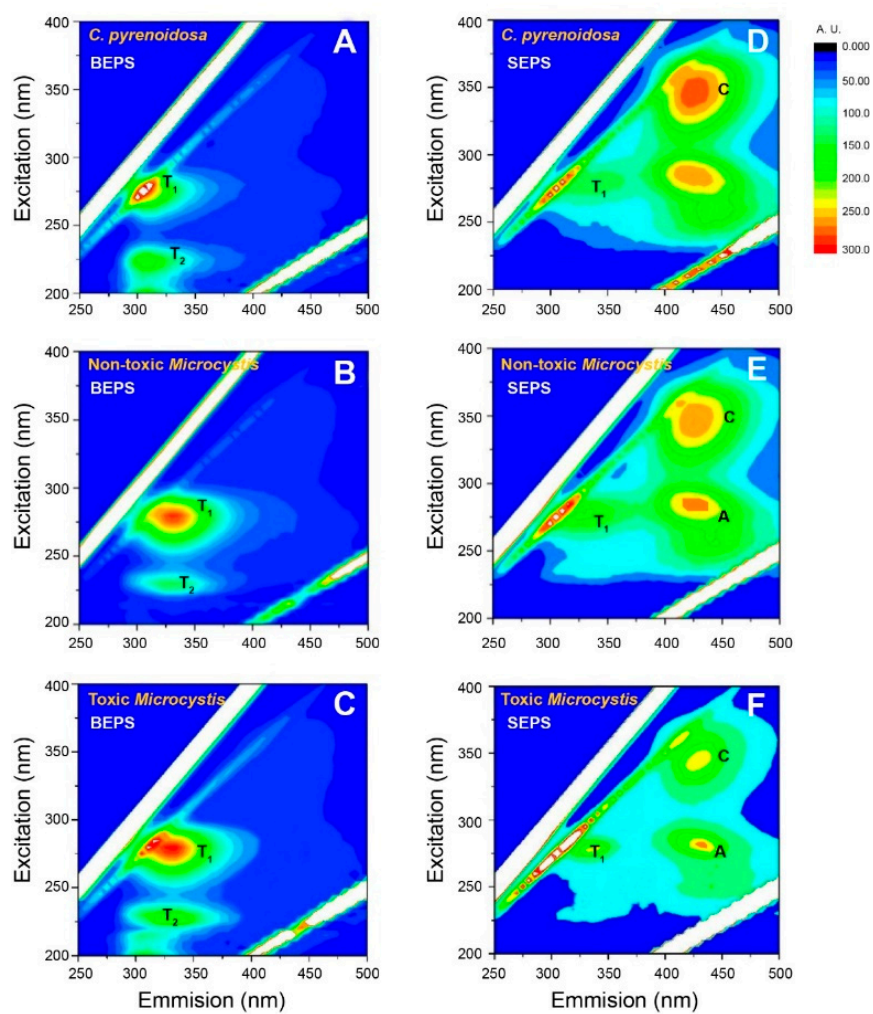

**Figure S3.** Fluorescence EEM spectra for EPS produced by three species.

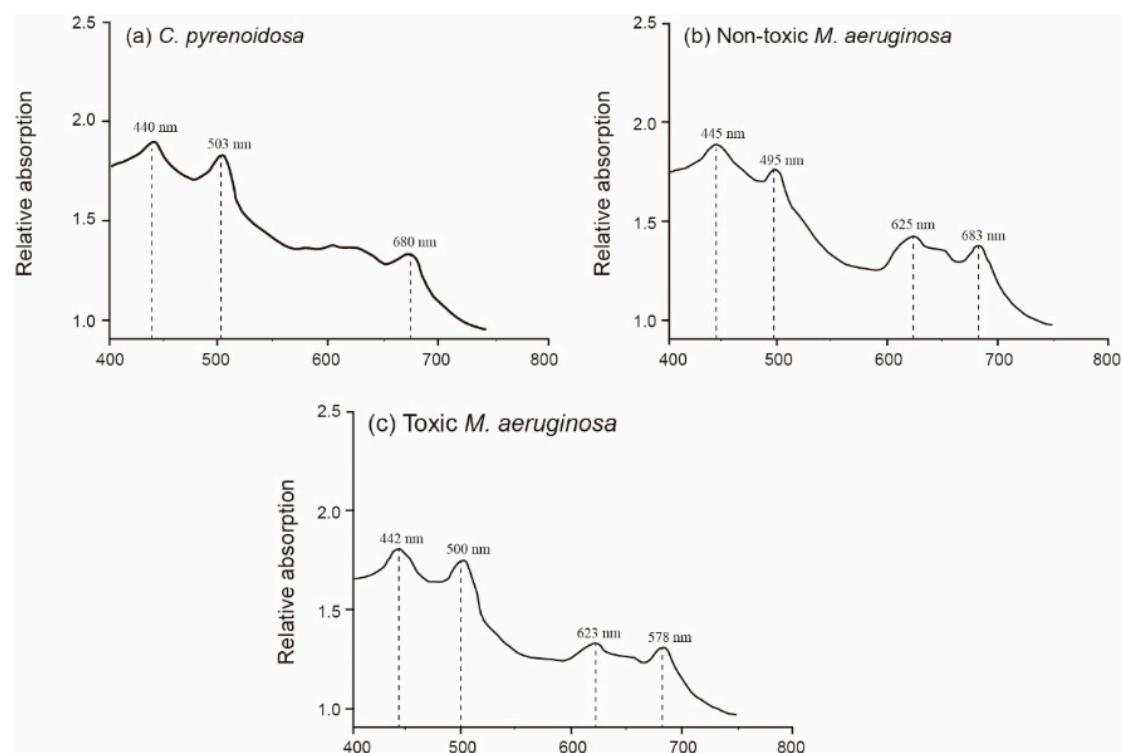

**Figure S4.** Whole-cell absorption spectra of algal cultures at the beginning of monocultures. Cell cultures with OD<sub>680</sub> of 0.10 were used for measurement and adsorption values were normalized to the optical density at OD<sub>680</sub>.

**Table S1.** Composition of the modified BG<sub>11</sub> medium under different growth conditions in our experiment.

| Stock solution                                                      |               | Normal growth conditions |               | Nutrient enrichment conditions |               |
|---------------------------------------------------------------------|---------------|--------------------------|---------------|--------------------------------|---------------|
| Composition                                                         | Concentration | Dosage                   |               | Dosage                         |               |
|                                                                     |               | [/L culture medium]      | Concentration | [/L culture medium]            | Concentration |
| K <sub>2</sub> HPO <sub>4</sub> ·3H <sub>2</sub> O                  | 0.175 mol/L   | 0.5 mL                   | 0.088 μmol/L  | 1 mL                           | 0.175 μmol/L  |
| MgSO <sub>4</sub> ·7H <sub>2</sub> O                                | 75 mg/mL      | 1 mL                     | 37.5 mg/L     | 1 mL                           | 75 mg/L       |
| CaCl <sub>2</sub> ·2H <sub>2</sub> O                                | 36 mg/mL      | 1 mL                     | 18 mg/L       | 1 mL                           | 36 mg/L       |
| Citric Acid                                                         | 6 mg/mL       | 1 mL                     | 3 mg/L        | 1 mL                           | 6 mg/L        |
| Ammonium Ferric Citrate                                             | 20 mg/mL      | 0.5 mL                   | 10 mg/L       | 1.5 mL                         | 30 mg/L       |
| EDTA-Na <sub>2</sub>                                                | 1 mg/mL       | 1 mL                     | 0.5 mg/L      | 1 mL                           | 1 mg/L        |
| Na <sub>2</sub> CO <sub>3</sub>                                     | 20 mg/mL      | 1 mL                     | 10 mg/L       | 1 mL                           | 20 mg/L       |
| NaNO <sub>3</sub>                                                   | 2.35 mol/L    | 1.5 mL                   | 3.53 μmol/L   | 3 mL                           | 7.06 μmol/L   |
| A <sub>5</sub> solution:                                            |               | <b>N/P ratio</b>         | 40.11         | <b>N/P ratio</b>               | 40.11         |
| H <sub>3</sub> BO <sub>3</sub>                                      | 2.86 g/L      |                          |               |                                |               |
| MnCl <sub>2</sub> ·4H <sub>2</sub> O                                | 1.86 g/L      |                          |               |                                |               |
| ZnSO <sub>4</sub> ·7H <sub>2</sub> O                                | 0.22 g/L      |                          |               |                                |               |
| CuSO <sub>4</sub> ·5H <sub>2</sub> O                                | 80 mg/L       | 1 mL                     | \             | 1 mL                           | \             |
| (NH <sub>4</sub> ) <sub>2</sub> MoO <sub>4</sub> ·3H <sub>2</sub> O | 0.39 g/L      |                          |               |                                |               |
| Co(NO <sub>3</sub> ) <sub>2</sub> ·6H <sub>2</sub> O                | 0.05 g/L      |                          |               |                                |               |



**Table S2.** The maximum growth rate ( $\mu_{\max}$ ,  $d^{-1}$ ) and maximum cell density ( $10^6$  cells/mL) of three species in the mono-cultures and co-cultures under nutrient enrichment conditions and the percentage change of maximum cell density showing in parentheses.

| Algal species in different cultures |                                | PAR treatment |                 | UV-B treatment |                 |
|-------------------------------------|--------------------------------|---------------|-----------------|----------------|-----------------|
|                                     |                                | $\mu_{\max}$  | Maximum density | $\mu_{\max}$   | Maximum density |
| Mono-cultures                       | <i>C. pyrenoidosa</i>          | 1.68          | 24.15           | 1.17           | 14.38           |
|                                     | Non-toxic <i>M. aeruginosa</i> | 0.86          | 17.22           | 0.83           | 13.12           |
|                                     | Toxic <i>M. aeruginosa</i>     | 0.76          | 15.58           | 0.74           | 13.54           |
| Co-cultures                         | <i>C. pyrenoidosa</i>          | 1.12          | 13.25 (54.9%)   | 0.67           | 6.05 (42.1%)    |
|                                     | Non-toxic <i>M. aeruginosa</i> | 0.82          | 12.21 (70.9%)   | 0.78           | 9.84 (75.0%)    |
|                                     | <i>C. pyrenoidosa</i>          | 0.92          | 7.55 (31.3%)    | 0.54           | 4.52 (31.4%)    |
|                                     | Toxic <i>M. aeruginosa</i>     | 0.81          | 11.34 (72.8%)   | 0.78           | 10.34 (76.4%)   |

## References

1. He, Y.Y.; Häder, D.P. Involvement of reactive oxygen species in the UV-B damage to the cyanobacterium *Anabaena* sp. *J. Photoch. Photobiol. B.* **2002**, *66*, 73–80.
2. Zhang, Y.; Jiang, H.B.; Qiu, B.S. Effects of UVB Radiation on competition between the bloom-forming cyanobacterium *Microcystis aeruginosa* and the chlorophyceae *Chlamydomonas microspheara*. *J. Phycol.* **2013**, *49*, 318.
3. Takaichi, S.; Mochimaru, M. Carotenoids and carotenogenesis in cyanobacteria: unique ketocarotenoids and carotenoid glycosides. *Cell. Mol. Life Sci.* **2007**, *64*, 2607–2619.
4. Lüder, U.H.; Knoetzel, J.; Wiencke, C. Acclimation of photosynthesis and pigments to seasonally changing light conditions in the endemic Antarctic red macroalga *Palmaria decipiens*. *Polar Biol.* **2001**, *24*, 598–603.
